# Supplementary material for: SciClone: Inferring Clonal Architecture and Tracking the Spatial and Temporal Patterns of Tumor Evolution
Source: PubMed Central journal article supplement (PMC4125065; doi:10.1371/journal.pcbi.1003665), 2014-08-07
Supplement: pcbi.1003665.s009.pdf [file pcbi.1003665.s009.pdf]

TABLE S1: Execution Time of SciClone (Variational Bayes) and PyClone (MCMC)

| Data Set                  | SciClone                        | PyClone    |         |                                   |
|---------------------------|---------------------------------|------------|---------|-----------------------------------|
|                           | Elapsed Time (sec) <sup>a</sup> | Iterations | Burn-in | Elapsed Time (sec) <sup>a,b</sup> |
| MM <sup>c</sup> (Fig. 1)  | 137.439 (20.053)                | 20,000     | 2,000   | 4,048.451 (207.430)               |
| AML <sup>d</sup> (Fig. 3) | 49.837 (2.867)                  | 20,000     | 2,000   | 14,267.76 (303.021)               |
| BRC <sup>c</sup> (Fig. 5) | 158.856 (9.946)                 | 22,000     | 2,200   | 2,265.293 (68.893)                |

<sup>a</sup>Mean elapsed time across ten runs. Standard deviation in parentheses.

<sup>b</sup>Elapsed times include analysis (`PyClone analyze`) and clustering (`PyClone cluster`).

<sup>c</sup>Analysis restricted to variants in copy-number neutral regions.

<sup>d</sup>All variants are in copy-number neutral regions.
